# Supplementary material for: Microtubule-dependent transport and dynamics of vimentin intermediate filaments
Source: PubMed Central journal article supplement — Mol Biol Cell. 2015 May 1;26(9):1675–86. doi: 10.1091/mbc.E14-09-1398 (PMC4436779; doi:10.1091/mbc.e14-09-1398), 2015-05-01
Supplement: supp_E14-09-1398v1_CombinedSupMats.pdf [file supp_E14-09-1398v1_CombinedSupMats.pdf]

# Supplemental Materials

*Molecular Biology of the Cell*

Hookway et al.

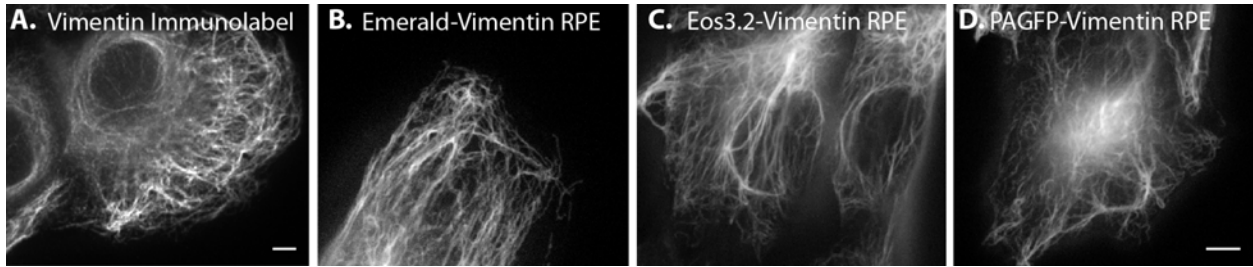

**Figure S1.** Tagged vimentin fusion proteins do not change vimentin network organization. Confocal images of RPE cell immunolabeled for vimentin (A.), expressing Emerald-vimentin (B.), expressing Eos3.2-vimentin (C.), and expressing PA-GFP-vimentin (D.) show that expression of probes produced normal networks and did not induce bundling or aggregation of vimentin. (Scale bars, 5  $\mu$ m)

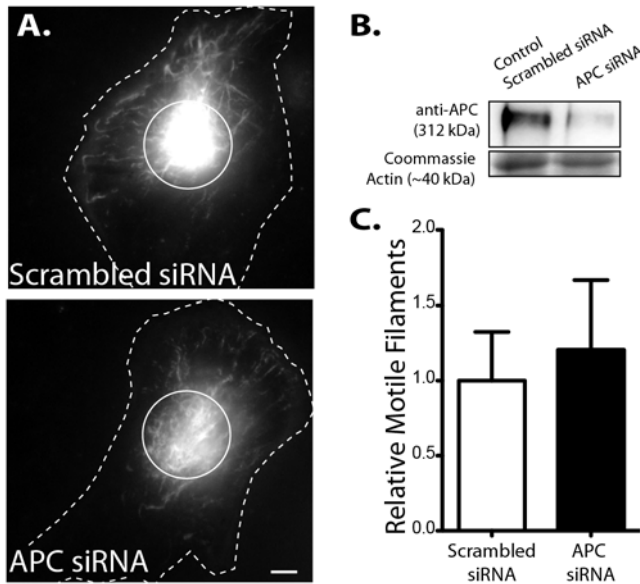

**Figure S2.** APC depletion does not affect vimentin IF transport. A. Similar amounts of transported filaments were observed in scrambled siRNA-transfected (control) RPE cells and APC-siRNA-transfected cells. (Scale bar, 5  $\mu$ m) B. Western blot of cell lysates reveals APC siRNA treatment was sufficient to deplete cells of APC protein. Top portion of gel was cut and blotted for APC, bottom was Coomassie-stained for loading control. C. Quantification of filament motility shows no difference between scrambled-siRNA controls (n = 17) and APC-depleted (n = 17) cells. 95% confidence interval represented by error bars.

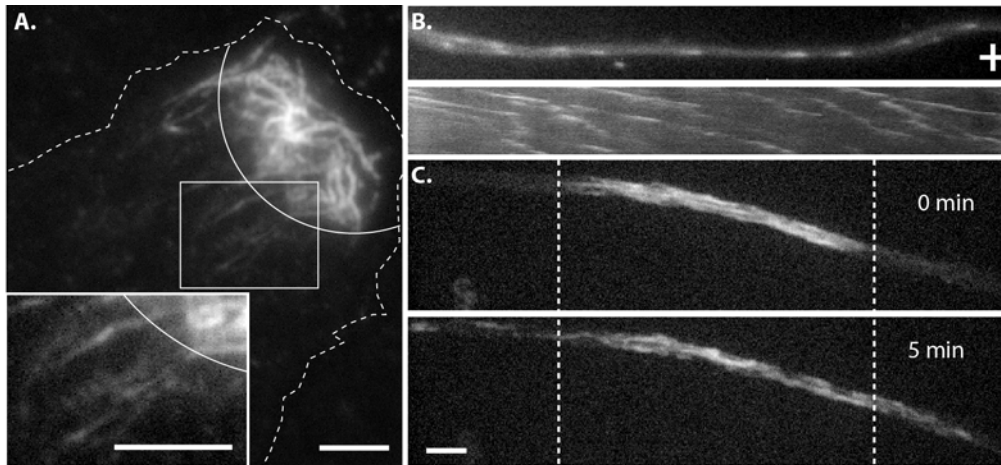

**Figure S3.** Vimentin filament transport occurs in anterograde and retrograde directions. A. RPE cell three minutes after photoconversion at the cell periphery (region marked with semi-circle). Inset shows many filaments have moved outside of the region towards the cell center. (Scale bars, 5  $\mu$ m) B. Microtubule plus-tip labeling by GFP-EB3 in CAD neurite (top). Kymograph of neurite over 1 min demonstrates uniform polarity of microtubules (bottom). B. PA-GFP-vimentin expressing CAD cell immediately after conversion (top) and after 3 minutes (bottom) shows that activated filaments are transported in both directions. (Scale bar, 5  $\mu$ m) Corresponds to Video 6.

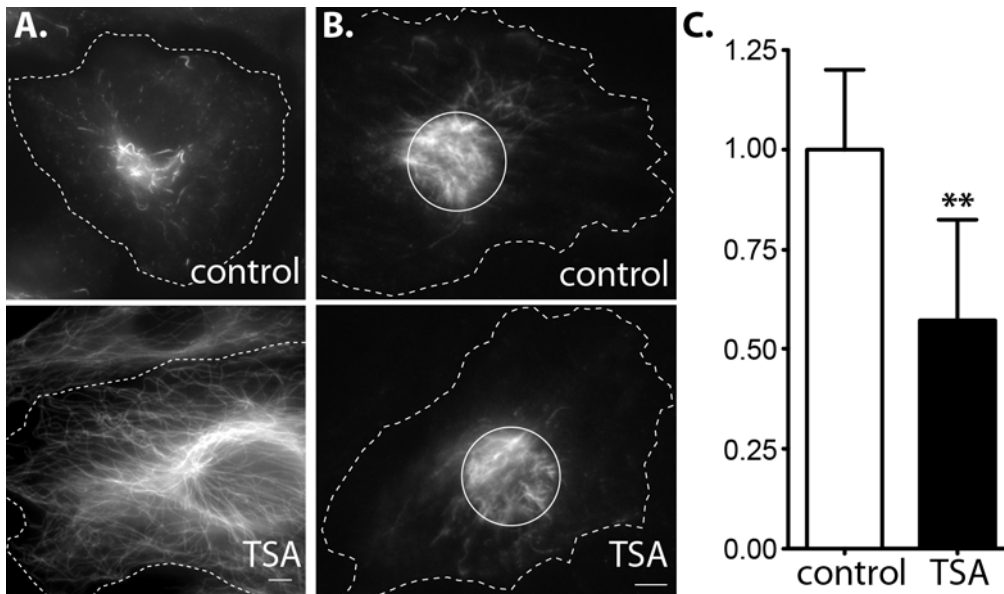

**Figure S4.** Increasing acetylated tubulin using the HDAC inhibitor TSA reduces filament transport. A. RPE cells labeled for acetylated tubulin in untreated control (top) and after ~16hrs TSA incubation (bottom) show that TSA increases microtubule acetylation. (Scale bar, 5  $\mu$ m) Representative cells at three minutes after photoconversion in area marked with circle. (Scale bar, 5  $\mu$ m) B. Quantification of filament transport. Error bars show 95% confidence interval.

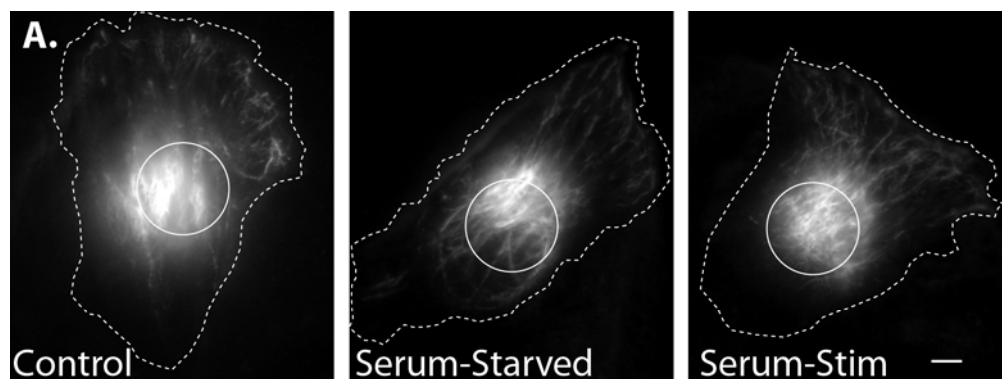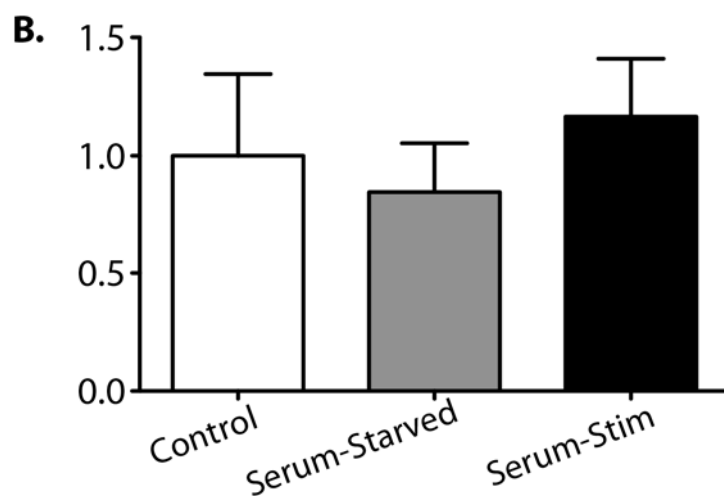

**Figure S5.** Serum starvation and serum stimulation do not affect filament motility. A. Representative cells three minutes after photoconversion in area marked with circle shows little difference in transport. (Scale bar = 5  $\mu$ m) B. Quantification of filament transport between groups. Error bars show 95% confidence interval.

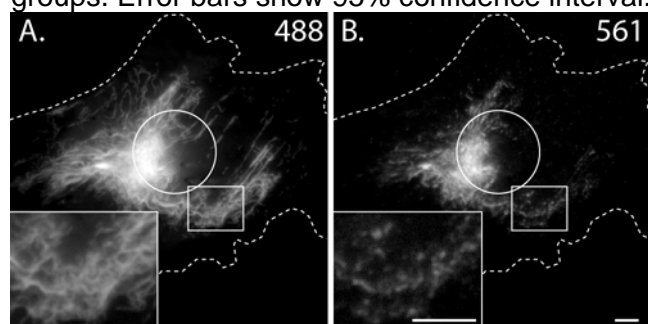

**Figure S6.** Severing and annealing occurs independently of microtubules. Nocodazole-treated Eos3.2-vimentin expressing SW13 cell 17 hours after it was photoconverted in the region marked with a circle in 488 and 561 channels (A. and B. respectively). Note that converted vimentin appears as segments along filaments in B. even in the absence of microtubules. (Scale bars, 5  $\mu$ m)

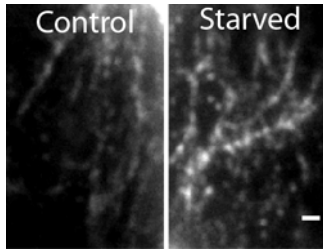

**Figure S7.** Severing and re-annealing persists even in serum-starved cells. Segmented filaments mEos3.2-vimentin RPE cells ~20 hours after a subset of vimentin filaments were photoconverted (as in figure 7) can be seen in both controls and cells starved of serum for 72 hours before conversion. (TIRFM, Scale bar = 1  $\mu$ m)
